# Supplementary material
Source: PubMed Central journal article supplement (PMC5396805)
Supplement: NIHMS72246-supplement-Supplemental_Digital_Content.pdf [file NIHMS72246-supplement-Supplemental_Digital_Content.pdf]

## Supplemental Digital Content

### Effect of change in neighborhood disadvantage on change in smoking behaviors in adults: a longitudinal within-individual study

Jaana I Halonen, Anna Pulakka, Sari Stenholm, Jaana Pentti, Ichiro Kawachi, Mika Kivimäki and Jussi Vahtera

#### eAppendix. Sample code for the analyses

\*Main analysis, continuous disadvantage (main Table 3);

\*Model a;

```
proc logistic data=repeated descending;
  by sex;
  *by manual;
  *by age65;
  model smoking = survey_year area_disadvantage;
  strata id; run;
```

\*Model b;

```
proc logistic data= repeated descending;
  by sex;
  *by manual;
  *by age65;
  model smoking = survey_year marital_status disease financial_difficulties
working_status area_disadvantage;
  strata id; run;
```

\*Secondary analysis, dichotomous disadvantage (eTable 2);

\*Model a;

```
proc logistic data= repeated_2 descending;
  by sex;
  *by manual;
  *by age65;
  class area_disadvantage2 (ref='1') / param=ref;
  model smoking = survey_year area_disadvantage2;
  strata id; run;
```

\*Model b;

```
proc logistic data= repeated_2 descending;
  by sex;
  *by manual;
  *by age65;
  class area_disadvantage2 (ref='1') / param=ref;
  model smoking = survey_year marital_status disease financial_difficulties
working_status area_disadvantage2;
  strata id; run;
```

**eTable 1.** Descriptive statistics of the changes in neighbourhood disadvantage using categorized disadvantage score.

| Case time point score | Control time point score |           |          |      |
|-----------------------|--------------------------|-----------|----------|------|
|                       | <-0.5                    | -0.5 - <0 | 0 - <0.5 | ≥0.5 |
| <-0.5                 | 1112                     | 81        | 55       | 39   |
| -0.5 - <0             | 89                       | 704       | 69       | 49   |
| 0 - <0.5              | 94                       | 77        | 499      | 36   |
| ≥0.5                  | 40                       | 67        | 50       | 382  |

**eTable 2.** Within-individual changes in smoking status in relation to change in neighbourhood disadvantage. Odds ratios for being a smoker when compared to control time point.

| Neighbourhood disadvantage, smoker vs. not | Model <sup>a</sup> |           | Model <sup>b</sup> |           |  |
|--------------------------------------------|--------------------|-----------|--------------------|-----------|--|
|                                            | OR                 | 95% CI    | OR                 | 95% CI    |  |
| All (n=2681)                               |                    |           |                    |           |  |
| < national mean                            | 1                  |           | 1                  |           |  |
| ≥ national mean                            | 1.28               | 1.03 1.58 | 1.25               | 1.00 1.56 |  |
| Men (n=641)                                |                    |           |                    |           |  |
| < national mean                            | 1                  |           | 1                  |           |  |
| ≥ national mean                            | 1.34               | 0.87 2.06 | 1.52               | 0.96 2.41 |  |
| Women (n=2040)                             |                    |           |                    |           |  |
| < national mean                            | 1                  |           | 1                  |           |  |
| ≥ national mean                            | 1.26               | 0.99 1.61 | 1.17               | 0.90 1.51 |  |
| <65 years (n=2437)                         |                    |           |                    |           |  |
| < national mean                            | 1                  |           | 1                  |           |  |
| ≥ national mean                            | 1.31               | 1.06 1.64 | 1.25               | 0.99 1.57 |  |
| ≥65 years (n=244)                          |                    |           |                    |           |  |
| < national mean                            | 1                  |           | 1                  |           |  |
| ≥ national mean                            | 1.14               | 0.43 3.01 | 1.72               | 0.61 4.86 |  |
| Non-manual (n=2290)                        |                    |           |                    |           |  |
| < national mean                            | 1                  |           | 1                  |           |  |
| ≥ national mean                            | 1.29               | 1.02 1.63 | 1.24               | 0.97 1.59 |  |
| Manual (n=371)                             |                    |           |                    |           |  |
| < national mean                            | 1                  |           | 1                  |           |  |
| ≥ national mean                            | 1.14               | 0.65 2.02 | 1.15               | 0.61 2.15 |  |

<sup>a</sup> Model adjusted for survey year

<sup>b</sup> Model adjusted for all time-variant covariates: survey year, marital status, chronic disease, severe financial difficulties and work status.

**eTable 3.** Within-individual changes in smoking intensity in relation to change in neighbourhood disadvantage. Odds ratios for being a heavy/moderate smoker when compared to control time.

| <b>Neighbourhood disadvantage,</b><br>Heavy/moderate vs. light | <b>Model<sup>a</sup></b> |               | <b>Model<sup>b</sup></b> |               |
|----------------------------------------------------------------|--------------------------|---------------|--------------------------|---------------|
|                                                                | <b>OR</b>                | <b>95% CI</b> | <b>OR</b>                | <b>95% CI</b> |
| All, (n=762)                                                   |                          |               |                          |               |
| < national mean                                                | 1                        |               | 1                        |               |
| ≥ national mean                                                | 1.20                     | 0.83 1.74     | 1.18                     | 0.81 1.72     |
| Men (n=141)                                                    |                          |               |                          |               |
| < national mean                                                | 1                        |               | 1                        |               |
| ≥ national mean                                                | 1.32                     | 0.52 3.31     | 1.16                     | 0.42 3.15     |
| Women (n=621)                                                  |                          |               |                          |               |
| < national mean                                                | 1                        |               | 1                        |               |
| ≥ national mean                                                | 1.17                     | 0.78 1.75     | 1.18                     | 0.78 1.80     |
| < 65 years (n=682)                                             |                          |               |                          |               |
| < national mean                                                | 1                        |               | 1                        |               |
| ≥ national mean                                                | 1.32                     | 0.91 1.94     | 1.27                     | 0.86 1.88     |
| ≥65 years (n=80)                                               |                          |               |                          |               |
| < national mean                                                | 1                        |               | 1                        |               |
| ≥ national mean                                                | na                       |               | na                       |               |
| Non-manual (n=604)                                             |                          |               |                          |               |
| < national mean                                                | 1                        |               | 1                        |               |
| ≥ national mean                                                | 1.26                     | 0.83 1.91     | 1.18                     | 0.77 1.80     |
| Manual (n=152)                                                 |                          |               |                          |               |
| < national mean                                                | 1                        |               | 1                        |               |
| ≥ national mean                                                | 1.00                     | 0.45 2.24     | 1.38                     | 0.53 3.56     |

<sup>a</sup> Model adjusted for survey year

<sup>b</sup> Model adjusted for all time-variant covariates: survey year, marital status, chronic disease, severe financial difficulties and work status

**eTable 4.** Between-individual association of change in neighborhood disadvantage and being a smoker. Results are presented as odds ratios (OR) with 95% confidence intervals (CI) those staying in a disadvantaged neighborhood serving as the reference group.

| Change in neighborhood disadvantage |        | Smoking |           |         |           |
|-------------------------------------|--------|---------|-----------|---------|-----------|
|                                     |        | Model 1 |           | Model 2 |           |
|                                     | N      | OR      | 95% CI    | OR      | 95% CI    |
| remained low <sup>a</sup>           | 30 676 | 1       |           | 1       |           |
| high <sup>b</sup> to low            | 2195   | 1.09    | 0.90-1.33 | 1.06    | 0.87-1.29 |
| low to high                         | 1937   | 1.27    | 1.04-1.56 | 1.24    | 1.01-1.51 |
| remained high                       | 12785  | 1.35    | 1.22-1.48 | 1.26    | 1.14-1.39 |

<sup>a</sup> national disadvantage score  $\leq 0$ ; <sup>b</sup> national disadvantage score  $> 0$

Model 1= adjusted for age, sex and baseline smoking status

Model 2= adjusted for age, sex, occupational status and baseline smoking status
